# Supplementary material
Source: PubMed Central journal article supplement (PMC4079376)
Supplement: supp_tpc.113.120535_tpc120535_Supplemental2.pdf [file supp_tpc.113.120535_tpc120535_Supplemental2.pdf]

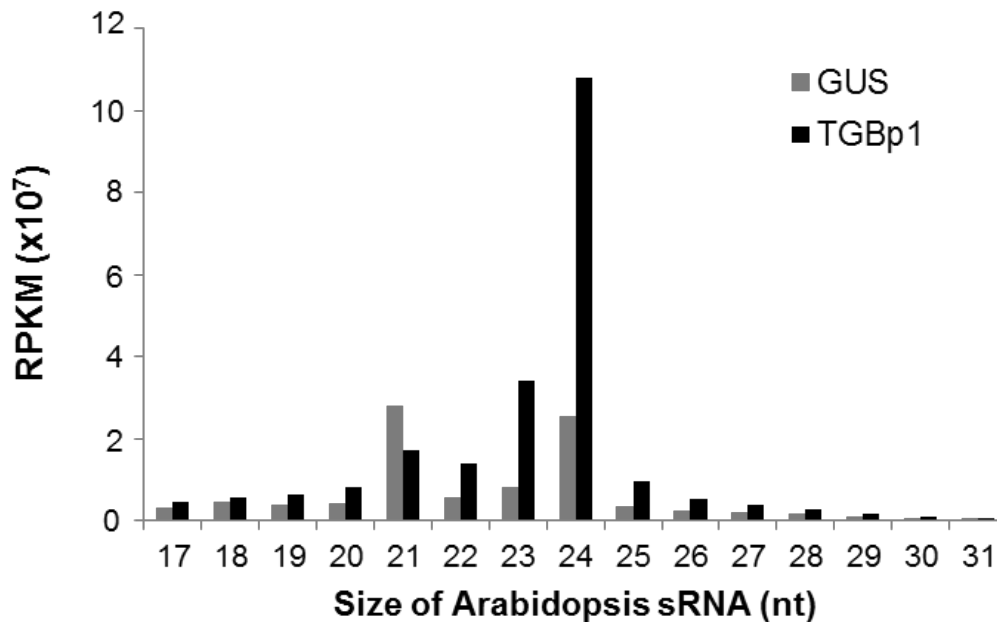

**Supplemental Figure 1.** Size distribution of *Arabidopsis* sRNAs in the GUS and the TGBp1 transformants.

The number of the sequencing reads annotated as known sRNAs recovered from the GUS (gray bars) and the TGBp1 transformants (black bars) sRNA library is expressed as reads per kilobase of exon model per million mapped reads (RPKM).

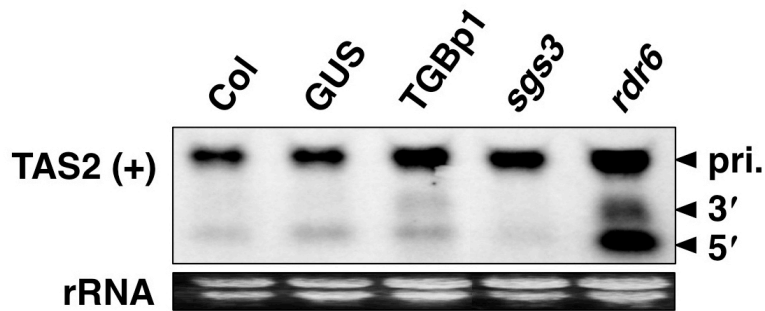

**Supplemental Figure 2.** RNA gel blot analysis to detect the primary TAS2 transcript and its cleavage products.

RNA gel blot analysis performed on 10  $\mu$ g of total RNA from plants at the reproductive stage to detect the primary TAS2 transcript (pri.) and its 5'- and 3'- cleavage products. Relative gel loadings are shown by ethidium bromide staining of rRNA.

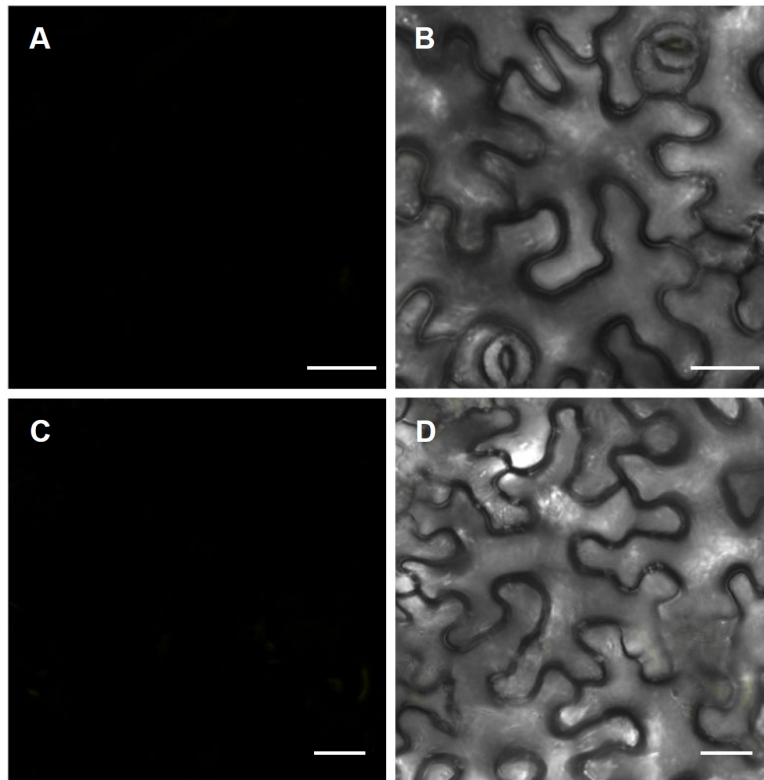

**Supplemental Figure 3.** Confocal laser scanning microscopy observation of RDR6.

**(A and B)** BiFC assay between TGBp1 and RDR6. TGBp1-YFP<sup>N</sup> and RDR6-YFP<sup>C</sup> were co-expressed by agroinfiltration in leaf epidermal cells of *N. benthamiana* plants. **(A)** YFP fluorescence image. **(B)** Overlay of bright-field and fluorescence image of (A). **(C and D)** Confocal sections of *N. benthamiana* leaves expressing RDR6-YFP alone. **(C)** YFP fluorescence image. **(D)** Overlay of bright-field and fluorescence image of (C). Bars: 25  $\mu$ m.

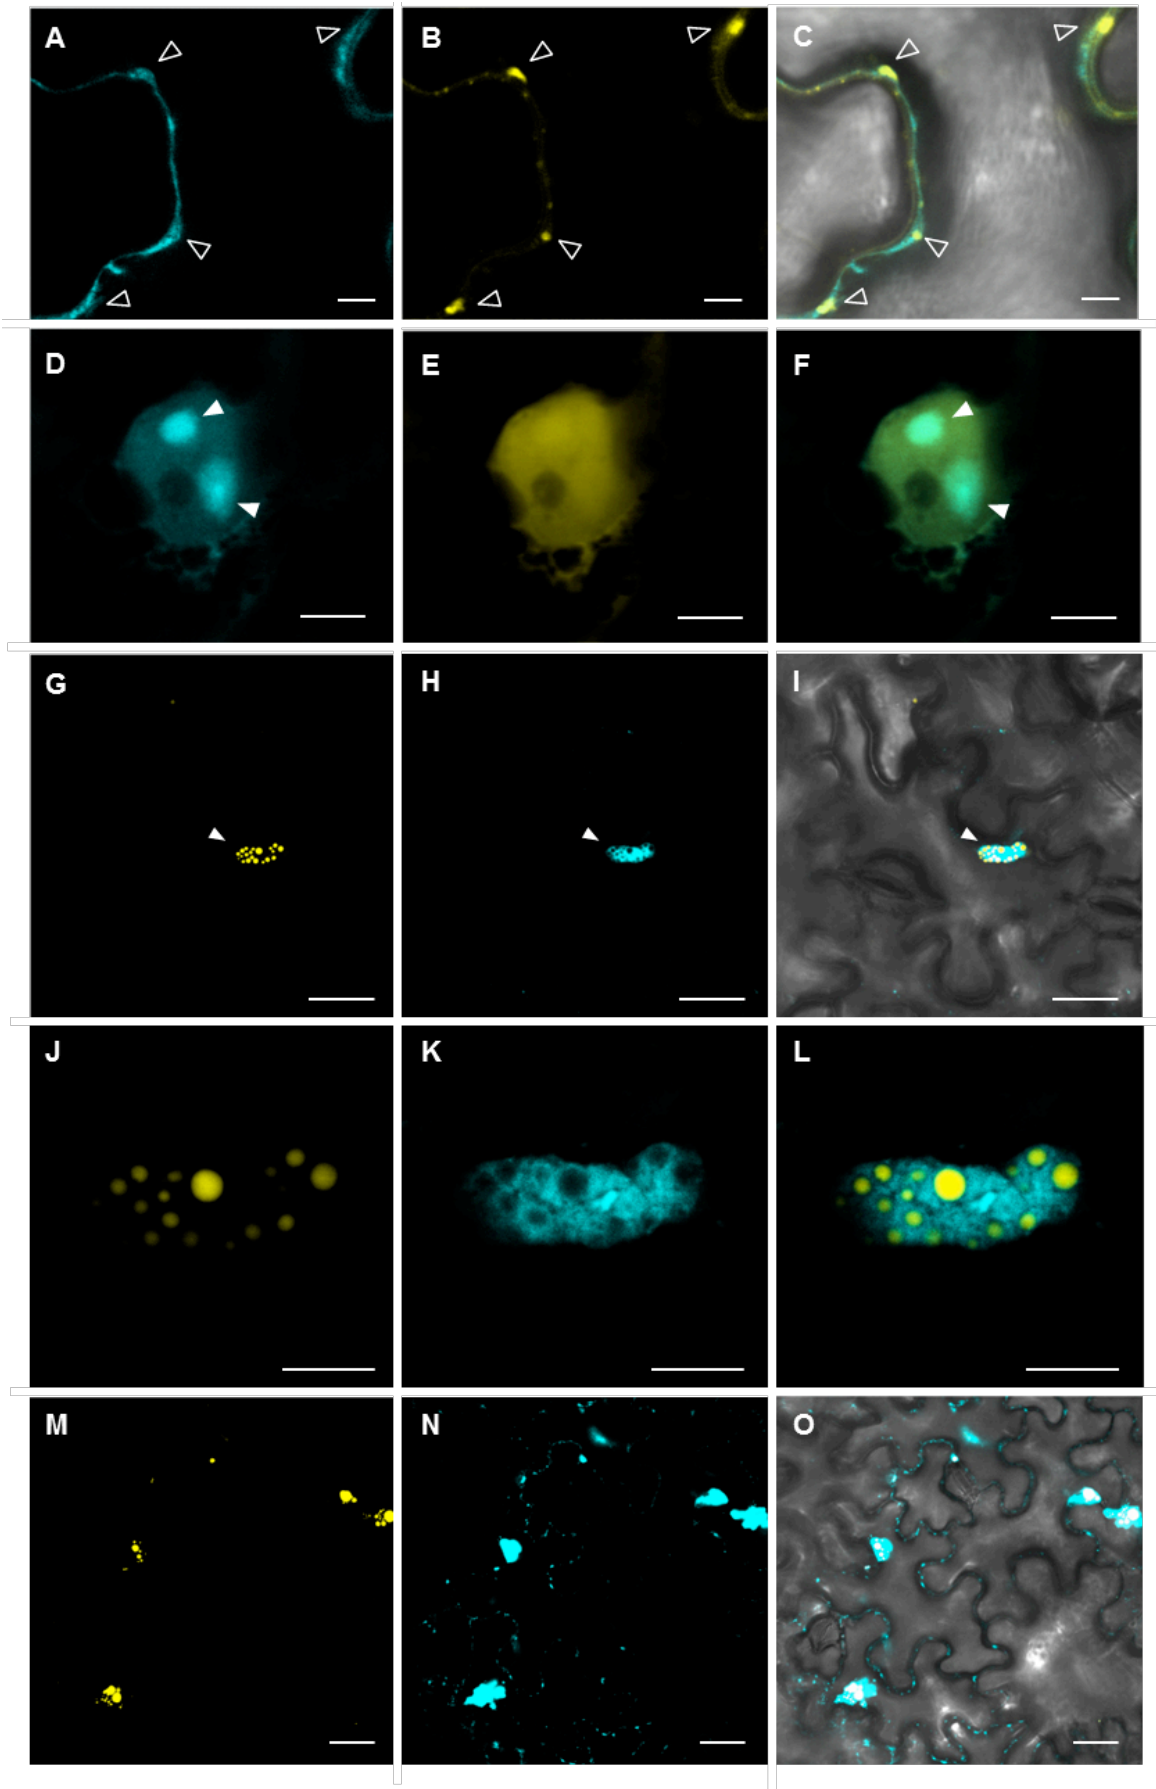

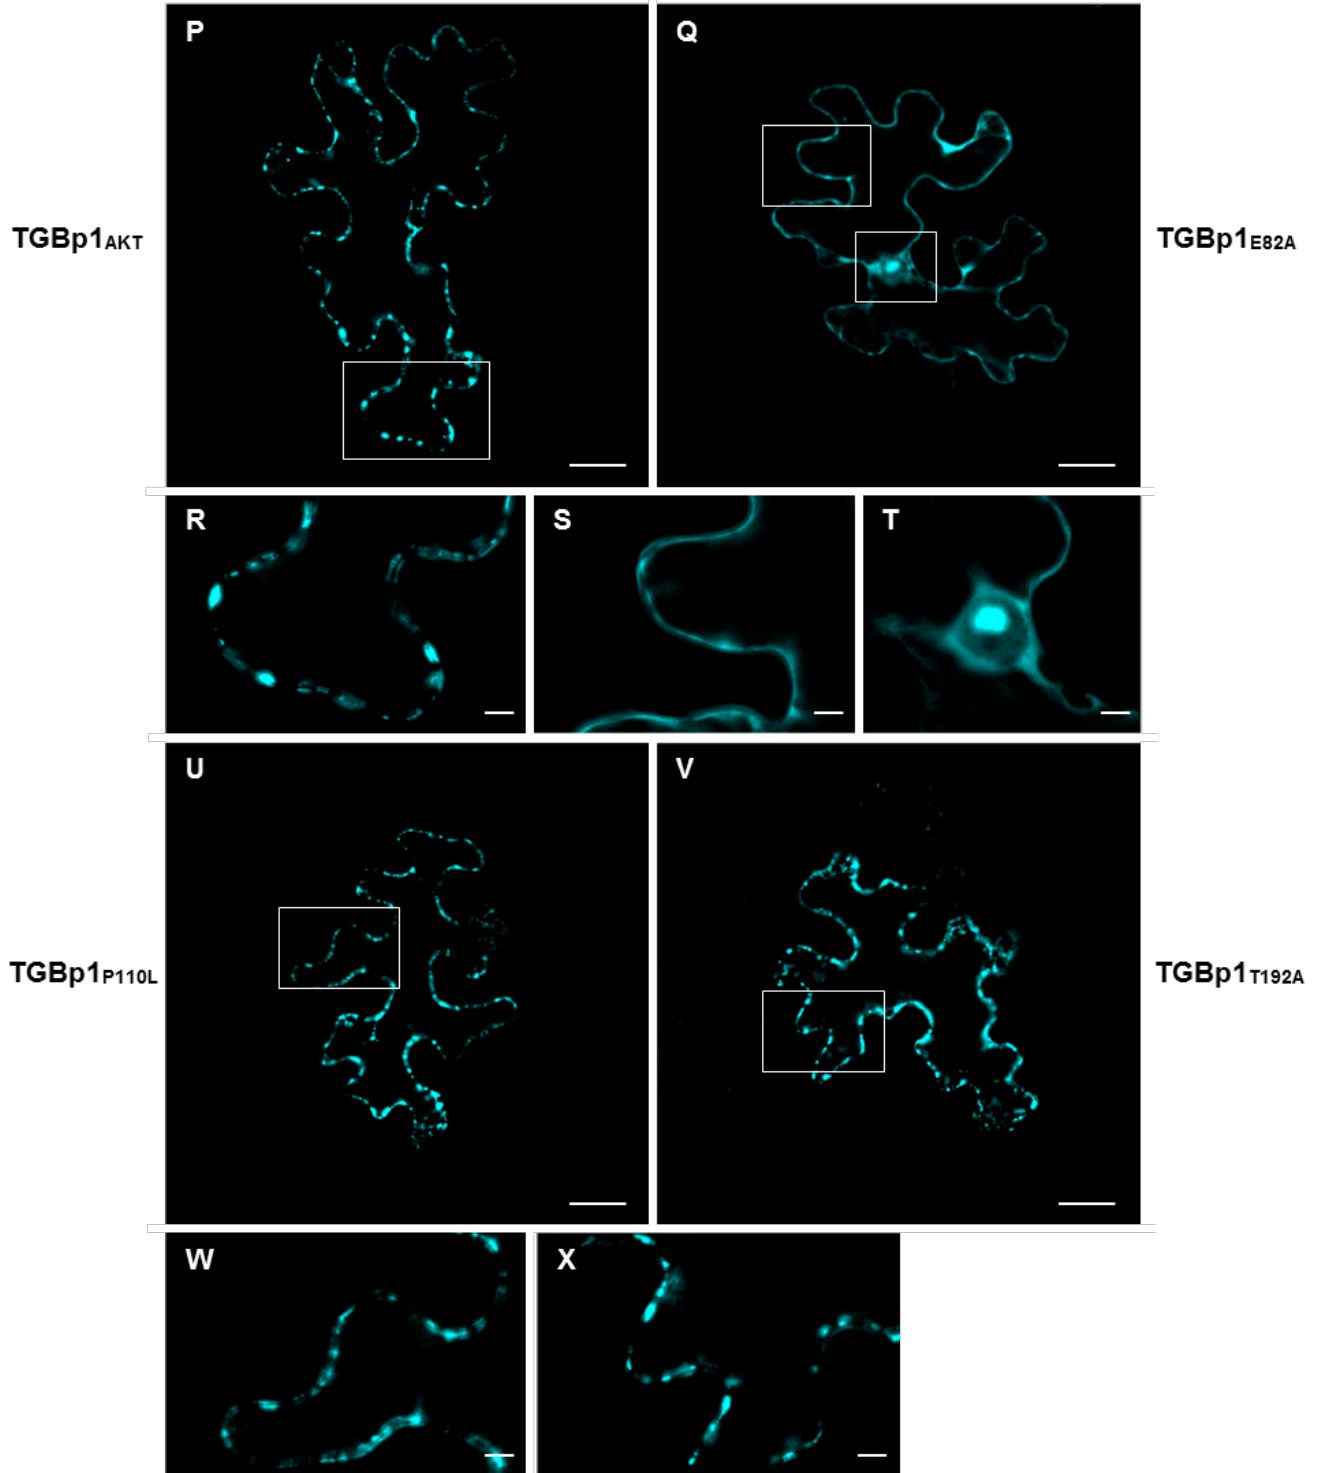

**Supplemental Figure 4.** Subcellular localizations of SGS3, TGBp1 and TGBp1 mutants.

**(A-C)** Confocal sections of *N. benthamiana* leaves co-expressing TGBp1-CFP and PDLP1-YFP.

Images show cell periphery of a single cell. The cyan and yellow signals of the same plane and the overlay of bright-field and fluorescence images are presented. TGBp1-CFP co-localized with PDLP1-YFP at the cell periphery (open arrowheads). **(D-F)** Confocal sections of *N. benthamiana* leaves co-

expressing TGBp1-CFP and YFP. The cyan and yellow signals of the same plane and the overlay of the fluorescence images are presented. TGBp1-CFP was localized throughout the entire nucleus with punctate structures (filled arrowheads). **(G-O)** Confocal sections of *N. benthamiana* leaves expressing

both SGS-YFP and TGBp1-CFP. **(G-I)** Images show a single cell different from the cell observed in Figure 4 **(F-H)**. The yellow and cyan signals of the same plane and the overlay of bright-field and

fluorescence images are presented. **(J-L)** Higher-magnification views of region near arrowheads in **(G-I)**. The yellow and cyan signals of the same plane and overlay of the fluorescence images are

presented. **(M-O)** Images show the same cells observed in Figure 4 **(F-H)** with a longer exposure. **(P**

**and R)** Confocal sections of *N. benthamiana* leaves expressing TGBp1<sub>AKT</sub>-CFP. **(R)** Higher-

magnification view of the boxed region in **(P)**. **(Q, S and T)** Confocal sections of *N. benthamiana*

leaves expressing TGBp1<sub>E82A</sub>-CFP. **(S and T)** Higher-magnification views of the upper left and lower right boxed region in **(Q)**, respectively. **(U and W)** Confocal sections of *N. benthamiana* leaves

expressing TGBp1<sub>P110L</sub>-CFP. **(W)** Higher-magnification view of the boxed region in **(U)**. **(V and X)**

Confocal sections of *N. benthamiana* leaves expressing TGBp1<sub>T192A</sub>-CFP. **(X)** Higher-magnification

view of the boxed region in **(V)**. Bars: 25  $\mu\text{m}$  except **(D-F)**, **(J-L)**, **(R)**, **(S)**, **(T)**, **(W)** and **(X)**: 5  $\mu\text{m}$

**Supplemental Table 1.** RPKM value of sRNA reads mapped to the *Arabidopsis* genome.

| Type              | GUS          |             | TGBp1        |             |
|-------------------|--------------|-------------|--------------|-------------|
|                   | Unique reads | Total reads | Unique reads | Total reads |
| miRNA             | 22,067,259   | 23,600,352  | 7,903,754    | 10,674,912  |
| mature            | 22,033,542   | 23,561,989  | 7,777,525    | 10,531,731  |
| hairpin           | 33,716       | 38,363      | 126,230      | 143,180     |
| rRNA              | 2,779        | 1,891,893   | 5,825        | 2,833,327   |
| tRNA              | 182,057      | 1,141,088   | 688,125      | 2,329,724   |
| snRNA             | 612          | 891         | 460          | 704         |
| snoRNA            | 3,447        | 3,806       | 7,626        | 9,014       |
| miscellaneous RNA | 20,296       | 21,830      | 16,787       | 21,880      |

**Supplemental Table 2.** Comparison of RPKM value of tasiRNAs from the GUS and TGBp1 transformant sRNA libraries.

| <b>Gene</b>  | <b>Gene family</b> | <b>GUS</b> | <b>TGBp1</b> | <b>Log<sub>2</sub> (TGBp1/GUS)</b> |
|--------------|--------------------|------------|--------------|------------------------------------|
| tasiRNA loci |                    |            |              |                                    |
| At2g27400    | TAS1a              | 3137.10    | 167.22       | -4.23                              |
| At1g50055    | TAS1b              | 917.94     | 87.54        | -3.39                              |
| At2g39675    | TAS1c              | 2534.72    | 389.38       | -2.70                              |
| At2g39681    | TAS2               | 7171.20    | 209.10       | -5.10                              |
| At3g17185    | TAS3a              | 488.45     | 70.64        | -2.79                              |
| At5g49615    | TAS3b              | 163.23     | 2.83         | -5.85                              |
| At5g57735    | TAS3c              | 3.52       | 2.89         | -0.28                              |
| At3g25795    | TAS4               | 10.20      | 2.63         | -1.96                              |



**Supplemental Table 3.** Characteristics of TGBp1 mutants used in this study.

|                        | Suppression of RNA silencing | Interaction with SGS3 | Co-aggregation with SGS3 | Formation of homo-oligomers |
|------------------------|------------------------------|-----------------------|--------------------------|-----------------------------|
| TGBp1                  | +                            | +                     | +                        | +                           |
| TGBp1 <sub>AKT</sub>   | -                            | -                     | -                        | -                           |
| TGBp1 <sub>E82A</sub>  | +                            | +                     | +                        | +                           |
| TGBp1 <sub>p110L</sub> | -                            | -                     | -                        | -                           |
| TGBp1 <sub>T192A</sub> | ±                            | +                     | -                        | -                           |

**Supplemental Table 4.** Primers used in this study.

| Primer          | Sequence (5' to 3')                               |
|-----------------|---------------------------------------------------|
| PITGBp1AKT-F    | TAGCTGGCGCGGCGAAAACCACACT                         |
| PITGBp1AKT-R    | GGTTTTCGCCGCGCCAGCTACAGCG                         |
| PITGBp1E82A-F   | TCCTCGACGCGTACTCCGCCCTCCA                         |
| PITGBp1E82A-R   | GGCGGAGTACGCGTCGAGGAGGTTG                         |
| PITGBp1P110L-F  | CTCGCGCTCCGACTCCACTTC                             |
| PITGBp1P110L-R  | ACTTTACGAAGTGGAGTCGGAG                            |
| PITGBp1T192A-F  | AGTTTGACACGGTCGCCGTCTG                            |
| PITGBp1T192A -R | CGGAGACGACGGCGACCGTG                              |
| ENTA-GUS-F      | AATTCAGTCGACTGGATCATGTTACGTCCTGTAGAAACC           |
| ENTA-GUS-R      | AAGCTGGGTCTAGATATCTTTGTTTGCCTCCCTGCTGCG           |
| ENTA-TGBp1-F    | AATTCAGTCGACTGGATCATGGACATAGTCATCTCAGCC           |
| ENTA-TGBp1-R    | AAGCTGGGTCTAGATAGTAGGTGGGGTGAGGTGG                |
| ENTA-SGS3-F     | AATTCAGTCGACTGGATCATGAGTTCTAGGGCTGGTCC            |
| ENTA-SGS3-R     | AAGCTGGGTCTAGATAATCATCTTCATTGTGAAGGCCATG          |
| ENTA-RDR6-F     | AATTCAGTCGACTGGATCATGGGGTCAGAGGGAAATATGAAGAAGTCGG |
| ENTA-RDR6-R     | AAGCTGGGTCTAGATAGAGACGCTGAGCAAGAACTTAGCCAAAG      |
| ENTA-PDLP-F     | CTGGATCCGGATGAAACTCACCTATCAATTC                   |
| ENTA-PDLP-R     | TATCTCGAGTGATAAGCATCATATTTACTCTTC                 |
| PPR-F           | GGAATAGGATTTTCAGATGCCGTATCTCTTG                   |
| PPR-R           | CACCTCTTTACATAATCCATTTACTACAA                     |
| ARF3-F          | TAAGGTGGGACGACATTGTGGC                            |
| ARF3-R          | TCAACACTTGTTCCGATGGTGG                            |
| Actin2-F        | GCACCCTGTTCTTCTTACCG                              |
| Actin2-R        | AACCCTCGTAGATTGGCACA                              |
| TAS2-767R       | TTGCATATCCATGAATATGTTTAG                          |
| TAS3-931R       | CTCCATCTTGTATCCCACTGAAA                           |
| TAS2-725R       | ATGAATCTTATATGTTTACTAAAACA                        |
| TAS3-910R       | CATACATCAATAACAAACAAAAGATATATG                    |
| TAS2-450F       | GAATGATGATACTTAAACTATTC                           |
| TAS2-570R       | ATGTATATCCCATTTCTACCATC                           |
| TAS3-704F       | TTGTAAGGCCTTTTCTTGACC                             |
| TAS3-841R       | ATGACTCGAACGAATTAGAGG                             |
